# Supplementary material for: Prediction models for prostate cancer to be used in the primary care setting: a systematic review
Source: PubMed Central journal article supplement (PMC7371149; doi:10.1136/bmjopen-2019-034661), 2020-07-19
Supplement: bmjopen-2019-034661supp001.pdf [file bmjopen-2019-034661supp001.pdf]

### **Search Strategy**

- 1) \* Prostatic Neoplasms/
- 2) Initial biopsy.mp
- 3) First biopsy.mp
- 4) \* “Early Detection of Cancer”/mt [Methods]
- 5) 2 or 3 or 4
- 6) 1 and 5
- 7) Nomograms/
- 8) “Neural Networks (Computer)”/
- 9) Risk Assessment/
- 10) Models, Statistical/
- 11) 7 or 8 or 9 or 10
- 12) 6 and 11
- 13) Limit 12 to English language
- 14) Limit 13 to abstracts
