# Supplementary material for: Prediction models for prostate cancer to be used in the primary care setting: a systematic review
Source: PubMed Central journal article supplement (PMC7371149; doi:10.1136/bmjopen-2019-034661), 2020-07-19
Supplement: bmjopen-2019-034661supp002.pdf [file bmjopen-2019-034661supp002.pdf]

*Supplementary File 2: Search results for independent studies that did external validation for included models.*

| <b>Study</b>  | <b>No. of citations in Google Scholar</b> | <b>No. of citations in Medline</b> | <b>No. of external validation found in Google Scholar</b> | <b>No. of external validation found in Medline</b> |
|---------------|-------------------------------------------|------------------------------------|-----------------------------------------------------------|----------------------------------------------------|
| Carlson, 1998 | 117                                       | 20                                 | Null                                                      | Null                                               |
| Babaian, 2000 | 128                                       | 13                                 | Null                                                      | Null                                               |
| Jansen, 2010  | 231                                       | 44                                 | Null                                                      | Null                                               |
| Hill, 2010    | 5                                         | 0                                  | Null                                                      | Null                                               |
| Lazzeri, 2013 | 195                                       | 0                                  | Null                                                      | Null                                               |
