# Supplementary material for: Prediction models for prostate cancer to be used in the primary care setting: a systematic review
Source: PubMed Central journal article supplement (PMC7371149; doi:10.1136/bmjopen-2019-034661), 2020-07-19
Supplement: bmjopen-2019-034661supp003.pdf [file bmjopen-2019-034661supp003.pdf]

**Supplementary File 3: Type of assays used to measure PSA and free PSA.**

| <b>Study</b>               | <b>PSA Assay</b>                                             | <b>Free PSA Assay</b>                                                           |
|----------------------------|--------------------------------------------------------------|---------------------------------------------------------------------------------|
| Carlson, 1998 <sup>1</sup> | PA immunoassay (Tosoh)                                       | Investigational doubleantibody radioimmunometric assay (PSA II, DIANON Systems) |
| Babaian, 2000 <sup>2</sup> | PSA immunometric assay (Tosoh)                               | Tandem R assay (Beckman Coulter, San Diego, Calif)                              |
| Jansen, 2010 <sup>3</sup>  | Access 2 Immunoassay System (Beckman Coulter, Brea, CA, USA) | Access 2 Immunoassay System (Beckman Coulter, Brea, CA, USA)                    |
| Hill, 2013 <sup>4</sup>    | N/A                                                          | N/A                                                                             |
| Lazzeri, 2013 <sup>5</sup> | Access 2 Immunoassay System (Beckman Coulter, Brea, CA, USA) | Access 2 Immunoassay System (Beckman Coulter, Brea, CA, USA)                    |

## References:

1. Carlson GD, Calvanese CB, Partin AW. An algorithm combining age, total prostate-specific antigen (PSA), and percent free PSA to predict prostate cancer: Results on 4298 cases. *Urology* 1998;52:455-61. doi: 10.1016/S0090-4295(98)00205-2
2. Babaian RJ, Fritsche H, Ayala A, et al. Performance of a neural network in detecting prostate cancer in the prostate-specific antigen reflex range of 2.5 to 4.0 ng/mL. *Urology* 2000;56:1000-6.
3. Jansen FH, van Schaik RHN, Kurstjens J, et al. Prostate-Specific Antigen (PSA) Isoform p2PSA in Combination with Total PSA and Free PSA Improves Diagnostic Accuracy in Prostate Cancer Detection. *European Urology* 2010;57:921-27. doi: 10.1016/j.eururo.2010.02.003
4. Hill OT, Mason TJ, Schwartz SW, et al. Improving prostate cancer detection in veterans through the development of a clinical decision rule for prostate biopsy. *BMC urology* 2013;13 doi: 10.1186/1471-2490-13-6
5. Lazzeri M, Haese A, de la Taille A, et al. Serum Isoform [-2]proPSA Derivatives Significantly Improve Prediction of Prostate Cancer at Initial Biopsy in a Total PSA Range of 2–10 ng/ml: A Multicentric European Study. *European Urology* 2013;63:986-94. doi: 10.1016/j.eururo.2013.01.011
